# Supplementary material
Source: publisher figshare collection journal article supplement (https://tandf.figshare.com/ndownloader/files/15628079)
Supplement: Supplementary file 1 [file 15628079]

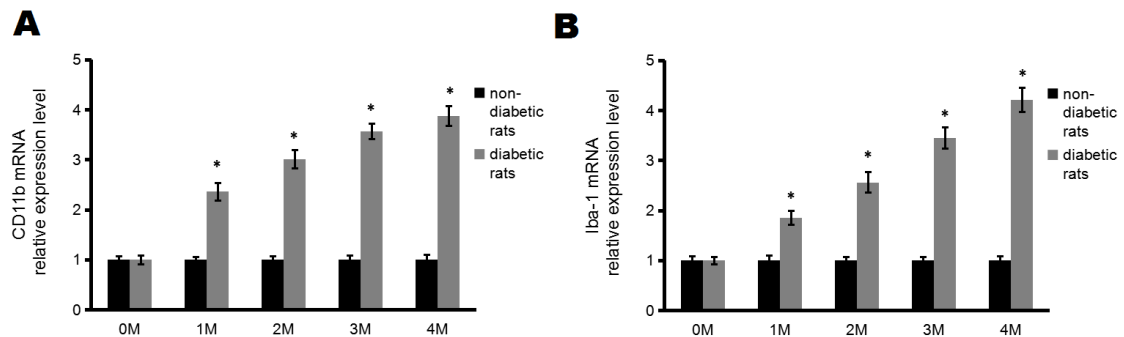

**Supplementary Figure 1. Microglia is involved in the inflammatory pathogenesis of DR.** (a) CD11b mRNA levels were detected using qRT-PCR at indicated time. The expression of CD11b mRNA in retina was increased in diabetic rats compared to non-diabetic rats. Data shown are the mean  $\pm$  SE of six independent experiments (n = 6 retina per group). \* $P < 0.05$  compared with non-diabetic rats. (b) *In vivo*, Iba-1 mRNA levels were detected using qRT-PCR at indicated time. Data shown are the mean  $\pm$  SE of six independent experiments (n = 6 retina per group). \* $P < 0.05$  compared with non-diabetic rats.

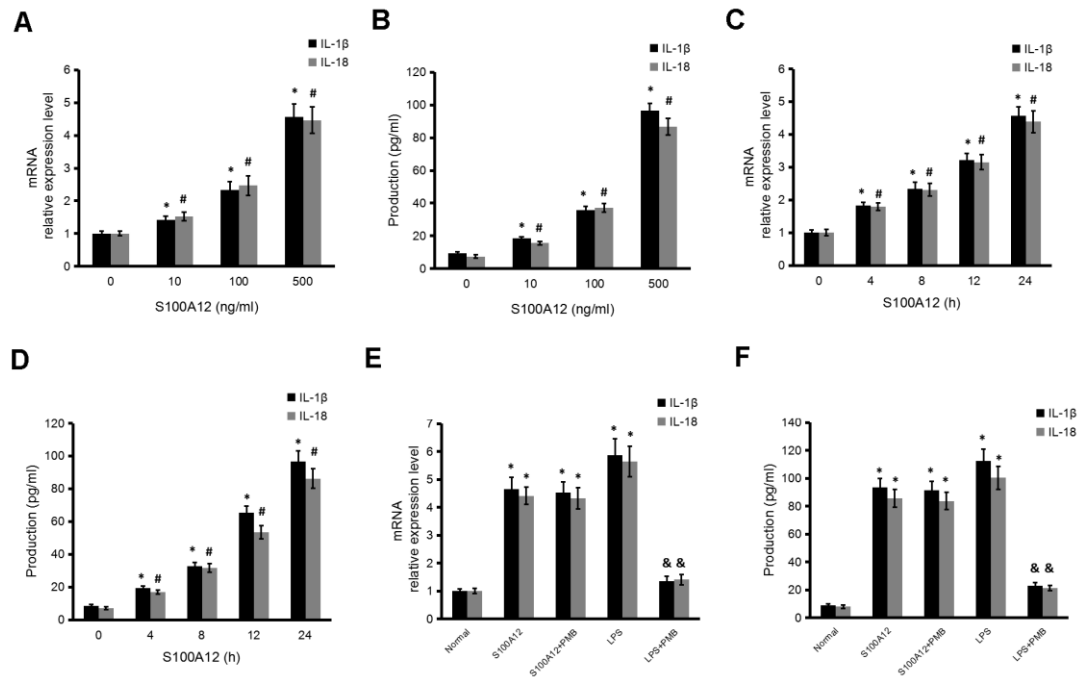

**Supplementary Figure 2. S100A12 induces retinal microglial activation and inflammation.** (a, b, c, d) The expression of IL-1 $\beta$  and IL-18 mRNA and protein in cultured retinal microglial cells induced by S100A12 was measured using qRT-PCR and ELISA, respectively. \* $P$ <0.05 compared with normal groups (IL-1 $\beta$ ) and # $P$ <0.05 compared with normal groups (IL-18). Data shown are the mean  $\pm$  SE of six independent experiments ( $n = 6$ ). (e, f) Polymyxin B (1  $\mu$ g/mL) resulted in approximately 75% inhibition of IL-1 $\beta$  and IL-18 mRNA and protein in microglia activated by purified LPS (1  $\mu$ g/mL). However, pretreated with polymyxin B (1  $\mu$ g/mL) did not reduce the IL-1 $\beta$  and

IL-18 mRNA and protein induced by S100A12. PBM, polymyxin B. \* $P < 0.05$  compared with normal groups and  $^{\&}P < 0.05$  compared with LPS groups. Data shown are the mean  $\pm$  SE of six independent experiments (n = 6).
